# Supplementary material
Source: publisher site journal article supplement (https://www.spandidos-publications.com/1334/downloadSupplementary)
Supplement: Supplementary file 1 [file downloadSupplementary]

## Sheet: all
symbol	as_id	splice_type	exons	from_exon	to_exon	novel_splice	percent with values	psi_range	std_psi
ANGEL2	9775	AP	1	null	null	0	0.981	0.7779	0.1366
CAMKK2	24845	AP	1	null	null	0	0.9381	0.4001	0.0525
KIAA0391	27213	AP	2.1	null	null	0	0.9762	0.7944	0.129
TRAPPC6B	27360	ES	4	3	5	0	0.969	0.5504	0.0864
SERPINA1	29121	AA	2.4	1.1	2.5	0	0.7738	0.8449	0.1242
CLEC16A	34006	AD	11.2	11.1	12	0	0.9452	1	0.1667
GPR56	36580	AA	16.1	15	16.2	0	0.981	0.4251	0.0742
SLC43A2	38344	AP	2	null	null	0	0.95	0.5686	0.098
GAA	44021	ES	2.2	1	3	1	0.9143	0.8618	0.1222
SMIM7	48190	AD	7.2	7.1	9.1	0	0.9714	0.9635	0.1304
USHBP1	48249	AA	3.1:3.2	2	3.3	0	0.85	0.6708	0.1071
ZNF540	49541	AP	2	null	null	0	0.7571	1	0.2756
ARHGEF1	50098	AP	1	null	null	0	0.9762	0.7992	0.1571
ZNF544	52425	AT	10.2	null	null	0	0.981	0.7723	0.1272
ANKRD36	54594	AT	76	null	null	0	0.9786	0.8163	0.1413
NDUFB3	56780	AA	2.1	1	2.2	0	0.9571	0.5872	0.1057
FAM110A	58466	AP	4.1	null	null	0	0.9762	0.4453	0.0754
DNMT3B	58964	ES	23	22	24	0	0.9071	0.4337	0.0543
RHOA	64857	ES	03:04:05	2	6	1	0.981	0.537	0.0696
RBM6	64950	ES	04:05:06	2	7	0	0.9214	0.8671	0.1537
ACPL2	67063	ES	6	5	9	0	0.9452	0.7474	0.1101
FAM175A	69801	ES	7	6	8	0	0.9429	0.4529	0.0511
SLC10A7	70775	ES	13	12	14	0	0.8214	0.8618	0.1912
PDE4D	72144	AP	1	null	null	0	0.9167	1	0.3073
TRAPPC13	72245	ES	9	7	10	0	0.9452	0.7503	0.1277
FAM49B	85160	ES	5	4	6	0	0.981	0.7174	0.1182
ATE1	91855	ME	8|9	7	10	0	0.9405	0.8308	0.1513
EEF1D	98099	ES	6	1	7.2	1	0.9738	0.7291	0.1233
RPL13A	264941	ES	2.1:2.2	1	3	1	0.9571	0.7459	0.1296
COL1A2	1412008	ES	23:24:25:26:27:28:29:30:31:32:33:34:35:36:37:45:46:47	22	48	1	0.7952	0.6737	0.0953

## Sheet: AA
symbol	as_id	splice_type	exons	from_exon	to_exon	novel_splice	percent with values	psi_range	std_psi
AGTRAP	670	AA	4.1	3	4.2	0	0.95	1	0.1492
INPP5B	1850	AA	16.1	15	16.2	0	0.85	1	0.1388
USP33	3533	AA	15.1	14	15.2	0	0.9714	0.7571	0.1071
TSACC	8246	AA	7.1	6	7.2	0	0.8476	1	0.1472
IGSF9	8424	AA	9.1	8	9.2	0	0.9786	0.3645	0.0507
AP2A2	13822	AA	8.1	7	8.2	0	0.981	0.5226	0.055
FAM111A	16027	AA	3.1:3.2	2	3.3	0	0.9643	0.907	0.2237
TMEM25	19023	AA	2.2	1	2.3	0	0.9143	0.605	0.0928
NPAS3	27146	AA	6.1	4.2	6.2	0	0.831	0.6758	0.089
SERPINA1	29121	AA	2.4	1.1	2.5	0	0.7738	0.8449	0.1242
UBALD1	33770	AA	2.3:2.4	1.2	2.5	0	0.9333	0.8702	0.1223
BRD7	36379	AA	14.1	13	14.2	0	0.981	0.3703	0.0508
GPR56	36580	AA	16.1	15	16.2	0	0.981	0.4251	0.0742
ADAT1	37634	AA	5.1	4	5.2	0	0.8119	0.46	0.07
INCA1	38643	AA	7.1	6	7.2	0	0.8333	0.5393	0.1099
TNK1	38931	AA	4.1	3	4.2	0	0.8452	0.4641	0.0775
KIF18B	41925	AA	13.1	12	13.2	0	0.9571	0.7166	0.086
DHPS	47831	AA	9.1	7	9.2	0	0.9714	0.4052	0.056
USHBP1	48249	AA	3.1:3.2	2	3.3	0	0.85	0.6708	0.1071
DNAAF3	52039	AA	3.1	2	3.2	0	0.7571	0.4092	0.0562
LTBP1	53185	AA	12.1	11	12.2	0	0.9024	0.7794	0.1362
NDUFB3	56780	AA	2.1	1	2.2	0	0.9571	0.5872	0.1057
SLC19A1	60883	AA	8.1	7	8.2	0	0.981	0.3987	0.0639
GCAT	62160	AA	2.1	1	2.2	0	0.9786	0.6308	0.134
SETMAR	62996	AA	2.1:2.2	1	2.3	0	0.981	0.9331	0.1521
MEF2C	72759	AA	4.1	3	4.2	0	0.8381	0.828	0.1531
HARS2	73763	AA	2.1	1.3	2.2	0	0.9714	0.8408	0.0955
POLM	79455	AA	9.1	8	9.2	0	0.9452	0.4752	0.0505
WNK2	86906	AA	30.1	29	30.2	0	0.8214	0.5112	0.1112
KDM5C	89193	AA	7.1	6	7.2	0	0.9762	0.4686	0.0563

## Sheet: AD
symbol	as_id	splice_type	exons	from_exon	to_exon	novel_splice	percent with values	psi_range	std_psi
RNF220	2559	AD	9.2	9.1	10.1	0	0.981	0.4697	0.078
GBP3	3711	AD	2.2	2.1	4	0	0.8762	0.7797	0.088
POLL	12901	AD	1.2:1.3:1.4:1.5	1.1	3	0	0.981	0.5773	0.1171
PWWP2B	13500	AD	2.2	2.1	3	0	0.981	0.3518	0.0628
PGAP2	14005	AD	11.2	11.1	12	0	0.981	0.486	0.0757
HTATIP2	14715	AD	1.2	1.1	1.5	0	0.8857	0.7484	0.1015
ERC1	19664	AD	1.2	1.1	3.2	0	0.769	0.8781	0.172
RNPS1	33256	AD	2.2:2.3	2.1	3	0	0.9548	0.6476	0.1121
CLEC16A	34006	AD	11.2	11.1	12	0	0.9452	1	0.1667
GPR56	36585	AD	3.2	3.1	5.2	0	0.8381	0.6518	0.0746
TMEM170A	37613	AD	5.3	5.2	6.1	0	0.9381	0.8619	0.144
MPDU1	39002	AD	5.3	5.2	7	1	0.9524	0.5021	0.0721
TADA2A	40522	AD	6.2	6.1	7	0	0.9452	0.3767	0.055
MFSD11	43685	AD	2.4	2.3	2.6	0	0.8976	0.7838	0.1474
SMIM7	48190	AD	7.2	7.1	9.1	0	0.9714	0.9635	0.1304
MYO9B	48231	AD	39.3	39.2	40	0	0.9786	0.5781	0.0913
CAPNS1	49368	AD	1.2	1.1	2.3	0	0.9762	0.6258	0.091
YIF1B	49610	AD	2.2	2.1	3.2	0	0.95	0.7547	0.1219
ZSCAN18	52408	AD	3.2	3.1	4	1	0.9524	0.5488	0.0814
SEC23B	58804	AD	1.2	1.1	3	0	0.969	0.7523	0.08
AURKA	59872	AD	1.2:1.3	1.1	4	0	0.8929	0.9032	0.1548
EVA1C	60343	AD	6.3	6.2	7	0	0.9643	0.5693	0.0794
YBEY	60918	AD	2.2	2.1	4	0	0.8476	0.5819	0.063
RPL15	63732	AD	1.3	1.2	3.2	0	0.981	0.3831	0.0625
MTFR2	77902	AD	1.2	1.1	2	0	0.869	0.9549	0.1807
KRIT1	80429	AD	1.3:1.4:1.5	1.2	2.1	0	0.8976	1	0.1908
ZSCAN25	80706	AD	4.3	4.2	5	0	0.9048	0.4546	0.0685
SLC12A9	81010	AD	1.2	1.1	2	0	0.8952	0.8403	0.1324
SLC52A2	85575	AD	1.4	1.3	2.2	0	0.9714	0.3942	0.0582
TRMT2B	89626	AD	2.2:2.3	2.1	3	0	0.8095	1	0.1991

## Sheet: AP
symbol	as_id	splice_type	exons	from_exon	to_exon	novel_splice	percent with values	psi_range	std_psi
MACF1	1870	AP	43.1	null	null	0	0.8119	0.9716	0.2446
ANGEL2	9775	AP	1	null	null	0	0.981	0.7779	0.1366
TMEM9B	14285	AP	1	null	null	0	0.981	0.371	0.0681
MADD	15713	AP	1	null	null	0	0.8476	0.8334	0.1476
EEF1G	16350	AP	2	null	null	0	0.981	0.4802	0.0552
CAMKK2	24845	AP	1	null	null	0	0.9381	0.4001	0.0525
EP400NL	25240	AP	2.1	null	null	0	0.9738	0.9544	0.1203
KIAA0391	27213	AP	2.1	null	null	0	0.9762	0.7944	0.129
JDP2	28500	AP	2	null	null	0	0.981	0.5847	0.1023
JDP2	28503	AP	4	null	null	0	0.981	0.545	0.1014
SLC43A2	38344	AP	2	null	null	0	0.95	0.5686	0.098
PCGF2	40582	AP	2.1	null	null	0	0.9762	0.8501	0.1538
CLUL1	44450	AP	2	null	null	0	0.8929	1	0.1695
MEF2B	48590	AP	1	null	null	0	0.7762	0.918	0.2591
ZNF540	49541	AP	2	null	null	0	0.7571	1	0.2756
ARHGEF1	50098	AP	1	null	null	0	0.9762	0.7992	0.1571
PPP1R13L	50435	AP	2	null	null	0	0.9262	0.8857	0.1628
SH3YL1	52494	AP	2	null	null	0	0.981	0.5132	0.0836
FAM110A	58466	AP	4.1	null	null	0	0.9762	0.4453	0.0754
MAPK12	62807	AP	1	null	null	0	0.7857	0.7116	0.148
RBM47	69086	AP	1	null	null	0	0.981	0.5972	0.0787
UBE2D3	70117	AP	3.1	null	null	0	0.981	0.4964	0.0982
MYO10	71601	AP	1	null	null	0	0.9786	0.5098	0.0645
PDE4D	72144	AP	1	null	null	0	0.9167	1	0.3073
LEMD2	75766	AP	1.1	null	null	0	0.981	0.4274	0.0672
NUDT1	78606	AP	1	null	null	0	0.9786	0.6475	0.1078
NUDT1	78608	AP	2	null	null	0	0.9786	0.6135	0.1021
MID1	88461	AP	3.1	null	null	0	0.9357	0.8684	0.2054
SH3KBP1	88641	AP	1	null	null	0	0.981	0.8478	0.1616
SH3KBP1	88643	AP	10	null	null	0	0.981	0.7941	0.1538

## Sheet: AT
symbol	as_id	splice_type	exons	from_exon	to_exon	novel_splice	percent with values	psi_range	std_psi
OSCP1	1777	AT	7	null	null	0	0.981	0.6855	0.1204
FPGT-TNNI3K	3457	AT	29	null	null	0	0.8476	0.9739	0.2487
HS2ST1	3691	AT	8	null	null	0	0.981	0.4579	0.0827
ADAMTSL4	7486	AT	16.2	null	null	0	0.981	0.3604	0.054
UBAP2L	7814	AT	29	null	null	0	0.981	0.5066	0.0915
PCGF5	12509	AT	4	null	null	0	0.981	0.7729	0.1463
HPS1	12760	AT	10.2	null	null	0	0.981	0.4778	0.0638
TMEM180	12952	AT	8	null	null	0	0.981	0.5886	0.0885
CSTF3	14883	AT	22	null	null	0	0.981	0.762	0.1554
CLEC7A	20310	AT	3	null	null	0	0.9714	0.4788	0.0798
PTHLH	20908	AT	6	null	null	0	0.9286	0.5416	0.083
PSPC1	25402	AT	9	null	null	0	0.981	0.6752	0.1373
PSPC1	25403	AT	11	null	null	0	0.981	0.5149	0.0949
RFC3	25610	AT	9	null	null	0	0.981	0.4461	0.0522
COCH	27088	AT	11	null	null	0	0.8857	0.8274	0.108
KLC1	29468	AT	14.3	null	null	0	0.981	0.5499	0.0853
SYT17	34293	AT	9	null	null	0	0.981	0.7584	0.1224
JUP	40930	AT	15.3	null	null	0	0.981	0.5377	0.1001
ZNF544	52425	AT	10.2	null	null	0	0.981	0.7723	0.1272
ANKRD36	54594	AT	76	null	null	0	0.9786	0.8163	0.1413
ANKRD36	54595	AT	77	null	null	0	0.9786	0.8163	0.1498
CFLAR	56794	AT	17	null	null	0	0.981	0.4281	0.0845
RAPH1	57077	AT	16	null	null	0	0.9714	0.7512	0.1097
KRBOX1	64325	AT	10	null	null	0	0.9476	1	0.2488
ST3GAL6	65793	AT	11	null	null	0	0.981	0.5863	0.1075
ST3GAL6	65794	AT	16	null	null	0	0.981	0.5978	0.103
PDE4D	72145	AT	8.2	null	null	0	0.981	0.8047	0.1079
C8orf46	84018	AT	7	null	null	0	0.9429	0.4771	0.0864
MROH1	85542	AT	14	null	null	0	0.981	0.7022	0.1239
NR4A3	87062	AT	9	null	null	0	0.9762	0.4891	0.0671

## Sheet: ES
symbol	as_id	splice_type	exons	from_exon	to_exon	novel_splice	percent with values	psi_range	std_psi
SCMH1	2054	ES	0.255556	5	9	0	0.9357	1	0.1612
WAC	11105	ES	9	8	10	0	0.981	0.3403	0.0559
BTAF1	12524	ES	0.0176632	24	26.2	0	0.8143	0.5729	0.0927
SERGEF	14558	ES	12	11	14	0	0.981	0.6071	0.101
TMEM218	19283	ES	0.0854167	1.2	4.2	0	0.9786	0.5113	0.0554
TMTC4	26199	ES	2	1	3	0	0.9738	0.8011	0.1209
TRAPPC6B	27360	ES	4	3	5	0	0.969	0.5504	0.0864
UBALD1	33772	ES	1.3:2.3	1.2	2.5	0	0.9214	0.5338	0.1103
SPAG9	42494	ES	30	29	31	0	0.95	0.9633	0.1824
LLGL2	43463	ES	26	25	27	0	0.981	0.5035	0.0826
GAA	44021	ES	2.2	1	3	1	0.9143	0.8618	0.1222
ZNF667	52180	ES	0.00142593	1	6	0	0.8667	1	0.2183
PLB1	53066	ES	1.78037	41	45	0	0.8357	0.86	0.172
SMPD4	55300	ES	11	10	14	0	0.981	0.7613	0.1248
DNMT3B	58964	ES	23	22	24	0	0.9071	0.4337	0.0543
SLC4A7	63780	ES	26	25	27	0	0.8619	0.54	0.0965
RHOA	64857	ES	0.127836	2	6	1	0.981	0.537	0.0696
RBM6	64950	ES	0.170208	2	7	0	0.9214	0.8671	0.1537
RBM6	64953	ES	0.170139	2	7	0	0.8262	0.6264	0.1102
ACPL2	67063	ES	6	5	9	0	0.9452	0.7474	0.1101
FAM175A	69801	ES	7	6	8	0	0.9429	0.4529	0.0511
SLC10A7	70775	ES	13	12	14	0	0.8214	0.8618	0.1912
TRAPPC13	72245	ES	9	7	10	0	0.9452	0.7503	0.1277
PNISR	77056	ES	2	1	3	0	0.981	0.5318	0.0973
PEX2	84241	ES	4.2	2.2	5	0	0.9643	0.7366	0.133
FAM49B	85161	ES	5	3	6	0	0.9714	0.908	0.104
PDCD6	96852	ES	6.1	4	7	1	0.7976	0.7674	0.1567
EEF1D	98099	ES	6	1	7.2	1	0.9738	0.7291	0.1233
RPL13A	264941	ES	2.1:2.2	1	3	1	0.9571	0.7459	0.1296
COL1A2	1412008	ES	23:24:25:26:27:28:29:30:31:32:33:34:35:36:37:45:46:47	22	48	1	0.7952	0.6737	0.0953

## Sheet: ME
symbol	as_id	splice_type	exons	from_exon	to_exon	novel_splice	percent with values	psi_range	std_psi
ACER3	17910	ME	5|6	3	7	0	0.9048	0.3697	0.0517
FYN	77273	ME	11|12	10	13	0	0.981	0.7282	0.1252
ATE1	91855	ME	8|9	7	10	0	0.9405	0.8308	0.1513
GOLT1B	92984	ME	3|4	2	5	0	0.8905	0.7528	0.1645
SRGAP1	93242	ME	12|13	11	14	0	0.8452	0.8863	0.1521
RAB28	265743	ME	7|8	6	9	0	0.9262	0.4858	0.0599

## Sheet: RI
Symbol	AS ID	Splice type	Exons	From exon	To exon	Novel splice	Percent with values	PSI range	SD PSI
KCNAB2	367	RI	22.2	22.1	22.3	0	0.969	0.8257	0.0657
DMAP1	2547	RI	1.2	1.1	1.3	0	0.981	0.5899	0.1088
FNBP1L	3788	RI	16.2	16.1	16.3	0	0.981	0.7952	0.1023
C11orf48	16388	RI	1.6	1.5	1.7	0	0.8881	1	0.1893
POLR2G	16420	RI	2.2:2.3	2.1	2.4	0	0.9786	0.9273	0.1632
LRTOMT	17529	RI	6.2:6.3	6.1	6.4	0	0.9643	0.9089	0.1498
TM2D3	32769	RI	1.2	1.1	1.3	0	0.9786	0.3762	0.0561
RHBDF1	32790	RI	11.2	11.1	11.3	0	0.9595	0.2659	0.0563
RAB40C	32914	RI	3.2	3.1	3.3	0	0.9476	0.9599	0.1469
GLG1	37565	RI	27.2	27.1	27.3	0	0.981	0.4569	0.0583
C17orf58	43119	RI	1.2	1.1	1.3	0	0.981	0.7058	0.111
NT5C	43359	RI	4.2:4.3	4.1	4.4	0	0.9548	1	0.16
METTL23	43627	RI	4.3	4.2	4.4	0	0.9762	0.6404	0.115
CDKN2D	47553	RI	1.2	1.1	1.3	0	0.9738	0.7473	0.1365
RPS9	51816	RI	4.4	4.3	4.5	0	0.981	0.6159	0.1131
RPS9	51817	RI	4.2	4.1	4.3	0	0.981	0.539	0.0873
CNRIP1	53838	RI	1.2	1.1	1.3	0	0.8571	0.7589	0.128
ELMOD3	54246	RI	2.2	2.1	2.3	0	0.8833	1	0.196
UNC50	54643	RI	1.2:1.3	1.1	1.4	1	0.8595	0.8723	0.1975
RPL31	54735	RI	2.3	2.2	2.4	0	0.9786	0.8614	0.182
ID1	58896	RI	1.2	1.1	1.3	0	0.981	0.3731	0.0728
KIF9	64502	RI	2.2	2.1	2.3	0	0.8643	0.8761	0.155
HOPX	69372	RI	4.3:4.4:4.5	4.2	4.6	0	0.9381	0.5746	0.0796
TTC23L	71732	RI	7.2	7.1	7.3	0	0.8167	0.9393	0.2818
SOD2	78304	RI	8.2	8.1	8.3	0	0.981	0.6551	0.117
PILRB	80936	RI	8.4	8.3	8.5	0	0.9762	0.6859	0.1408
LETM2	83405	RI	3.3	3.2	3.4	0	0.9619	0.7145	0.1501
VPS28	85606	RI	3.5:3.6	3.4	3.7	0	0.9643	1	0.1843
CCDC107	86267	RI	3.2	3.1	3.3	0	0.981	0.3094	0.0571
TSC22D3	89839	RI	2.2:2.3	2.1	2.4	0	0.9524	0.5199	0.0581
